# Supplementary material for: Chronic Drinking During Adolescence Predisposes the Adult Rat for Continued Heavy Drinking: Neurotrophin and Behavioral Adaptation after Long-Term, Continuous Ethanol Exposure
Source: PubMed Central journal article supplement (PMC4773001; doi:10.1371/journal.pone.0149987), 2016-03-01
Supplement: pone.0149987.s001.pdf [file pone.0149987.s001.pdf]

## Behavioral and Neurotrophin Data

## Supplementary Data set 1.

| Rat ID | Treatment               | Age of Onset | Timepoint | DA1%  | DA2%  | DA1# | DA2# | SA%   | SA# | R-SA  | Simple | Compound 1 | Reversal 1 | Compound 2 | Reversal 2 | PFC BDNF | PFC NGF | HPC BDNF | HPC-NGF |
|--------|-------------------------|--------------|-----------|-------|-------|------|------|-------|-----|-------|--------|------------|------------|------------|------------|----------|---------|----------|---------|
| 11     | Chronic EtOH Treated    | Adolescent   | 1         |       |       |      |      |       |     |       |        |            |            |            |            | 2.95     | 21.45   |          |         |
| 17     | Chronic EtOH Treated    | Adolescent   | 1         |       |       |      |      |       |     |       |        |            |            |            |            | 12.24    | 6.77    | 35.79    | 31.53   |
| 25     | Chronic EtOH Treated    | Adolescent   | 1         |       |       |      |      |       |     |       |        |            |            |            |            | 4.56     | 13.24   | 35.25    | 30.9    |
| 31     | Chronic EtOH Treated    | Adolescent   | 1         |       |       |      |      |       |     |       |        |            |            |            |            | 11.31    | 10.47   | 61.05    | 32.91   |
| 39     | Chronic EtOH Treated    | Adolescent   | 1         |       |       |      |      |       |     |       |        |            |            |            |            | 5.66     | 6.99    | 81.68    | 39.67   |
| 45     | Chronic EtOH Treated    | Adolescent   | 1         |       |       |      |      |       |     |       |        |            |            |            |            | 3.02     | 10.21   | 39.25    | 25.51   |
| 52     | Chronic EtOH Treated    | Adolescent   | 1         |       |       |      |      |       |     |       |        |            |            |            |            |          | 21.23   | 58.36    | 31.57   |
| 91     | Chronic EtOH Treated    | Adolescent   | 1         |       |       |      |      |       |     |       |        |            |            |            |            | 9.83     | 8.68    | 51.7     | 32.77   |
| 14     | Water Treatment Control | Adolescent   | 1         |       |       |      |      |       |     |       |        |            |            |            |            | 17.22    | 11.43   | 27.73    | 25.62   |
| 16     | Water Treatment Control | Adolescent   | 1         |       |       |      |      |       |     |       |        |            |            |            |            | 14.94    | 15.35   | 59.08    | 31.33   |
| 20     | Water Treatment Control | Adolescent   | 1         |       |       |      |      |       |     |       |        |            |            |            |            | 13.72    | 7.55    | 59.87    | 38.19   |
| 22     | Water Treatment Control | Adolescent   | 1         |       |       |      |      |       |     |       |        |            |            |            |            | 12.48    | 16.53   | 33.74    | 34.28   |
| 26     | Water Treatment Control | Adolescent   | 2         |       |       |      |      |       |     |       |        |            |            |            |            | 10.71    | 23.63   | 62.61    | 31.04   |
| 28     | Water Treatment Control | Adolescent   | 2         |       |       |      |      |       |     |       |        |            |            |            |            | 9.31     | 21.16   | 80.46    | 32.33   |
| 32     | Water Treatment Control | Adolescent   | 2         |       |       |      |      |       |     |       |        |            |            |            |            | 9.44     | 11.44   | 52.72    | 55.59   |
| 34     | Water Treatment Control | Adolescent   | 2         |       |       |      |      |       |     |       |        |            |            |            |            | 15.98    | 20.16   | 50.03    | 34.54   |
| 4      | Chronic EtOH Treated    | Adult        | 1         |       |       |      |      |       |     |       |        |            |            |            |            | 6.77     | 2.22    | 60.67    | 21.18   |
| 6      | Chronic EtOH Treated    | Adult        | 1         |       |       |      |      |       |     |       |        |            |            |            |            | 0.76     | 15.31   | 51.64    | 19.2    |
| 9      | Chronic EtOH Treated    | Adult        | 1         |       |       |      |      |       |     |       |        |            |            |            |            | 4.57     | 1.9     | 25.5     | 23.88   |
| 59     | Chronic EtOH Treated    | Adult        | 1         |       |       |      |      |       |     |       |        |            |            |            |            | 3.97     | 7.78    | 30.94    | 30.08   |
| 65     | Chronic EtOH Treated    | Adult        | 1         |       |       |      |      |       |     |       |        |            |            |            |            | 5.93     | 4.8     | 43.68    | 26.49   |
| 71     | Chronic EtOH Treated    | Adult        | 1         |       |       |      |      |       |     |       |        |            |            |            |            | 11.03    | 2.44    | 42.77    | 22.12   |
| 83     | Chronic EtOH Treated    | Adult        | 1         |       |       |      |      |       |     |       |        |            |            |            |            | 10.31    | 3.9     | 28.11    | 20.32   |
| 58     | Water Treatment Control | Adult        | 1         |       |       |      |      |       |     |       |        |            |            |            |            | 10.98    | 8.79    | 39.39    | 25.3    |
| 64     | Water Treatment Control | Adult        | 1         |       |       |      |      |       |     |       |        |            |            |            |            | 8.47     | 10.12   | 38.13    | 27.35   |
| 70     | Water Treatment Control | Adult        | 1         |       |       |      |      |       |     |       |        |            |            |            |            | 9.93     | 11.03   | 142.39   | 39.97   |
| 72     | Water Treatment Control | Adult        | 1         |       |       |      |      |       |     |       |        |            |            |            |            | 13.85    | 4.32    | 24.9     | 30      |
| 78     | Water Treatment Control | Adult        | 1         |       |       |      |      |       |     |       |        |            |            |            |            | 16.6     | 14.24   | 41.68    | 22.17   |
| 82     | Water Treatment Control | Adult        | 2         |       |       |      |      |       |     |       |        |            |            |            |            | 12.75    | 10.97   | 77.09    | 39.99   |
| 84     | Water Treatment Control | Adult        | 2         |       |       |      |      |       |     |       |        |            |            |            |            |          | 21.02   | 33.63    | 17.19   |
| 85     | Water Treatment Control | Adult        | 2         |       |       |      |      |       |     |       |        |            |            |            |            | 9.68     | 24.63   | 50.79    | 42.09   |
| 86     | Water Treatment Control | Adult        | 2         |       |       |      |      |       |     |       |        |            |            |            |            | 7.51     | 17.6    | 109.25   | 40.94   |
| 13     | Chronic EtOH Treated    | Adolescent   | 2         |       |       |      |      |       |     |       |        |            |            |            |            | 15.42    | 4.67    | 106.05   | 30.59   |
| 19     | Chronic EtOH Treated    | Adolescent   | 2         |       |       |      |      |       |     |       |        |            |            |            |            | 14.38    | 12.4    |          |         |
| 21     | Chronic EtOH Treated    | Adolescent   | 2         |       |       |      |      |       |     |       |        |            |            |            |            | 11.02    | 11.65   | 27.93    | 23.58   |
| 27     | Chronic EtOH Treated    | Adolescent   | 2         |       |       |      |      |       |     |       |        |            |            |            |            | 7.01     | 5.69    | 27.07    | 22.27   |
| 33     | Chronic EtOH Treated    | Adolescent   | 2         |       |       |      |      |       |     |       |        |            |            |            |            | 17.43    | 9.67    | 85.87    | 49.89   |
| 41     | Chronic EtOH Treated    | Adolescent   | 2         |       |       |      |      |       |     |       |        |            |            |            |            | 14.24    | 11.32   | 35.2     | 24.74   |
| 46     | Chronic EtOH Treated    | Adolescent   | 2         |       |       |      |      |       |     |       |        |            |            |            |            | 20.13    |         | 46.61    | 22.39   |
| 48     | Chronic EtOH Treated    | Adolescent   | 2         |       |       |      |      |       |     |       |        |            |            |            |            | 19.12    | 22.72   | 49.79    | 40.93   |
| 1      | Chronic EtOH Treated    | Adult        | 2         |       |       |      |      |       |     |       |        |            |            |            |            | 10.45    | 9.94    | 33.27    | 23.27   |
| 5      | Chronic EtOH Treated    | Adult        | 2         |       |       |      |      |       |     |       |        |            |            |            |            | 5.19     | 5.88    | 27.64    | 20.19   |
| 69     | Chronic EtOH Treated    | Adult        | 2         |       |       |      |      |       |     |       |        |            |            |            |            | 11.01    | 5.98    | 38.38    | 23.51   |
| 73     | Chronic EtOH Treated    | Adult        | 2         |       |       |      |      |       |     |       |        |            |            |            |            | 10.11    | 14.92   | 31.78    | 25.95   |
| 77     | Chronic EtOH Treated    | Adult        | 2         |       |       |      |      |       |     |       |        |            |            |            |            | 7.77     | 5.67    | 50.42    | 25.5    |
| 79     | Chronic EtOH Treated    | Adult        | 2         |       |       |      |      |       |     |       |        |            |            |            |            | 7.95     | 3.47    | 31.05    | 24.17   |
| 87     | Chronic EtOH Treated    | Adult        | 2         |       |       |      |      |       |     |       |        |            |            |            |            | 5.37     | 20.78   | 57.13    |         |
| 90     | Chronic EtOH Treated    | Adult        | 2         |       |       |      |      |       |     |       |        |            |            |            |            | 6.94     | 13.25   |          |         |
| 15     | Chronic EtOH Treated    | Adolescent   | 3         | 18.75 | 22.22 | 17   | 19   | 45.71 | 38  | 54.5  | 9      | 9          | 18         | 11         | 21         | 10.7     | 4.92    |          | 53.83   |
| 23     | Chronic EtOH Treated    | Adolescent   | 3         | 61.54 | 73.33 | 14   | 16   | 33.33 | 21  | 33    | 11     | 11         | 8          | 6          | 7          | 9.33     | 5.78    | 65.33    | 27.43   |
| 29     | Chronic EtOH Treated    | Adolescent   | 3         | 72.73 | 50    | 12   | 23   | 41.86 | 46  | 40.9  | 26     | 31         | 34         | 18         | 32         | 12.54    | 23.86   | 53.32    | 33.81   |
| 35     | Chronic EtOH Treated    | Adolescent   | 3         | 46.15 | 83.33 | 14   | 7    | 26.92 | 29  | 18.18 | 6      | 7          | 15         | 6          | 6          | 8.77     | 9.54    | 40.66    | 40.09   |
| 37     | Chronic EtOH Treated    | Adolescent   | 3         | 71.43 | 55.55 | 8    | 10   | 44.44 | 30  | 50    | 11     | 6          | 21         | 6          | 10         | 6.44     | 15.62   | 57.13    | 10.72   |
| 43     | Chronic EtOH Treated    | Adolescent   | 3         | 87.5  | 50    | 9    | 9    | 31.43 | 38  | 31.8  | 6      | 11         | 13         | 15         | 8          | 7.97     | 19.82   | 29.13    | 27.36   |
| 44     | Chronic EtOH Treated    | Adolescent   | 3         | 83.33 | 59.09 | 7    | 23   | 23.81 | 45  | 9.09  | 15     | 8          | 18         | 6          | 10         | 8.17     | 17      | 45.43    | 28.01   |
| 50     | Chronic EtOH Treated    | Adolescent   | 3         | 53.33 | 60.8  | 16   | 24   | 26.92 | 30  | 22.7  | 13     | 32         | 13         | 18         | 20         | 9.48     | 2.31    | 37.87    | 29.92   |
| 18     | Water Treatment Control | Adolescent   | 3         | 66.66 | 62.5  | 10   | 9    | 46.15 | 16  | 46.15 | 6      | 11         | 11         | 6          | 8          | 11.31    | 11.02   | 42.2     | 24.56   |
| 24     | Water Treatment Control | Adolescent   | 3         | 80    | 53.85 | 16   | 14   | 28    | 45  | 31.8  | 6      | 13         | 9          | 8          | 6          | 7.96     | 16.05   | 36.66    | 31.12   |
| 30     | Water Treatment Control | Adolescent   | 3         | 61.11 | 58.82 | 19   | 18   | 30    | 13  | 30    | 13     | 6          | 21         | 6          | 6          | 8.07     | 12.19   | 44.74    | 28.17   |

Behavioral and Neurotrophin Data

|    |                         |            |   |       |       |    |    |       |    |       |    |    |    |    |    |       |       |       |       |
|----|-------------------------|------------|---|-------|-------|----|----|-------|----|-------|----|----|----|----|----|-------|-------|-------|-------|
| 49 | Water Treatment Control | Adolescent | 3 | 69.23 | 87.5  | 14 | 9  | 29.16 | 27 | 31.8  | 6  | 7  | 17 | 7  | 11 | 7.82  | 11.01 | 34.84 | 22.03 |
| 51 | Water Treatment Control | Adolescent | 3 | 62.5  | 62.5  | 9  | 9  | 23.68 | 38 | 18.18 | 6  | 19 | 19 | 9  | 11 | 15.62 | 15.11 | 48.14 | 29.78 |
| 88 | Water Treatment Control | Adolescent | 3 | 77.78 | 81.81 | 10 | 12 | 30.43 | 26 | 31.8  | 6  | 6  | 7  | 6  | 10 | 9.99  | 11.31 | 30.55 | 26.69 |
| 92 | Water Treatment Control | Adolescent | 3 | 50    | 60    | 9  | 11 | 41.66 | 15 | 41.6  | 6  | 8  | 7  | 6  | 6  | 12.76 | 17.96 | 59.17 | 24.66 |
| 95 | Water Treatment Control | Adolescent | 3 | 68.18 | 66.66 | 23 | 34 | 32.43 | 40 | 27.3  | 6  | 18 | 16 | 12 | 6  |       | 16.84 | 36.11 | 37.83 |
| 3  | Chronic EtOH Treated    | Adult      | 3 | 56.25 | 72.22 | 17 | 18 | 23.08 | 42 | 27.3  | 6  | 10 | 11 | 6  | 10 | 19.3  | 13.95 | 41.4  | 24.01 |
| 7  | Chronic EtOH Treated    | Adult      | 3 | 35.29 | 52.94 | 18 | 18 | 34.78 | 26 | 36.4  | 11 | 17 | 19 | 11 | 27 | 11.33 | 20.51 | 31.99 | 22.63 |
| 10 | Chronic EtOH Treated    | Adult      | 3 | 46.15 | 56.25 | 14 | 17 | 36.84 | 41 | 40.9  | 7  | 10 | 9  | 16 | 22 | 0.71  | 26.43 | 37.07 | 27    |
| 53 | Chronic EtOH Treated    | Adult      | 3 | 87.5  | 71.43 | 9  | 8  | 29.41 | 20 | 29.41 | 10 | 9  | 20 | 12 | 22 | 19.3  | 13.95 | 41.4  | 24.01 |
| 61 | Chronic EtOH Treated    | Adult      | 3 | 55.55 | 80    | 10 | 11 | 26.83 | 44 | 27.3  | 11 | 12 | 15 | 12 | 16 | 6.67  | 5.98  | 32.46 | 12.38 |
| 75 | Chronic EtOH Treated    | Adult      | 3 | 77.78 | 50    | 10 | 15 | 28.57 | 38 | 40.9  | 10 | 30 | 31 | 13 | 17 | 6.63  | 9.34  | 34    | 18.39 |
| 81 | Chronic EtOH Treated    | Adult      | 3 | 50    | 66.66 | 7  | 10 | 32.43 | 40 | 31.8  | 18 | 15 | 20 | 15 | 24 | 4.48  | 6.87  | 18.78 | 30.52 |
| 89 | Chronic EtOH Treated    | Adult      | 3 | 42.86 | 48    | 21 | 26 | 14.63 | 43 | 9.09  | 10 | 6  | 29 | 11 | 25 | 10.93 | 15.13 | 40.85 | 26.11 |
| 56 | Water Treatment Control | Adult      | 3 | 66.66 | 57.14 | 7  | 8  | 45.83 | 27 | 50    | 10 | 6  | 18 | 6  | 22 | 16.95 | 9.12  | 34.09 | 21.22 |
| 60 | Water Treatment Control | Adult      | 3 | 83.33 | 44.44 | 13 | 10 | 40.91 | 25 | 40.9  | 8  | 6  | 14 | 8  | 18 | 11.51 | 15.58 | 33.64 | 28.65 |
| 62 | Water Treatment Control | Adult      | 3 | 54.54 | 57.89 | 12 | 20 | 50    | 27 | 50    | 6  | 11 | 9  | 8  | 18 |       | 21.03 | 77.78 | 25.48 |
| 68 | Water Treatment Control | Adult      | 3 | 80    | 47.06 | 11 | 18 | 35.71 | 17 | 35.71 | 9  | 9  | 22 | 13 | 15 |       | 18.51 | 40.25 | 32.65 |
| 74 | Water Treatment Control | Adult      | 3 | 55.55 | 50    | 9  | 18 | 36.84 | 22 | 36.84 | 6  | 9  | 21 | 6  | 15 | 8.61  | 13.21 | 23.25 | 16.06 |
| 76 | Water Treatment Control | Adult      | 3 | 54.54 | 66.66 | 12 | 7  | 34.29 | 38 | 27.3  | 12 | 9  | 10 | 11 | 9  | 19    | 8.93  | 42.89 | 26.27 |
| 80 | Water Treatment Control | Adult      | 3 | 71.43 | 66.66 | 8  | 7  | 30    | 13 | 30    | 10 | 8  | 18 | 6  | 8  | 18.01 | 3.81  | 25.88 | 20.95 |
| 85 | Water Treatment Control | Adult      | 3 | 58.33 | 78.57 | 13 | 14 | 32.14 | 31 | 36.36 | 15 | 12 | 8  | 7  | 6  |       | 16.41 | 36.68 | 30.73 |
